# Supplementary material for: Structural determination of Streptococcus pyogenes M1 protein interactions with human immunoglobulin G using integrative structural biology
Source: PLoS Comput Biol. 2021 Jan 7;17(1):e1008169. doi: 10.1371/journal.pcbi.1008169 (PMC7817036; doi:10.1371/journal.pcbi.1008169)
Supplement: S2 Table — The average and standard deviations of the RMSD and RMSF values are recorded along the MD simulations for every chain of each replicate. (XLSX) [file pcbi.1008169.s003.xlsx]

## Sheet: Sheet1
RMSD (Å)	M1 peptide		Fc-domain chain A		Fc-domain chain B
replicate	M1(A)-IgG1(Fc)	M1(S)-IgG1(Fc)	M1(A)-IgG1(Fc)	M1(S)-IgG1(Fc)	M1(A)-IgG1(Fc)	M1(S)-IgG1(Fc)
1	2.33+/-1.08	4.34+/-1.11	4.90+/-0.74	4.99+/-0.89	4.27+/-0.54	4.37+/-0.68
2	4.43+/-1.09	2.50+/-0.69	4.63+/-0.89	5.51+/-0.72	6.88+/-0.80	5.13+/-1.18
3	3.41+/-1.03	4.51+/-0.97	4.75+/-1.19	4.07+/-0.96	4.35+/-0.74	4.71+/-0.82
4	3.94+/-1.29	3.07+/-0.82	5.31+/-1.36	5.52+/-0.93	6.20+/-1.62	3.80+/-0.65
5	3.73+/-0.67	5.05+/-1.44	3.34+/-0.40	5.61+/-0.60	3.97+/-0.69	4.10+/-0.59
RMSF (Å)	M1 peptide		Fc-domain chain A		Fc-domain chain B
replicate	M1(A)-IgG1(Fc)	M1(S)-IgG1(Fc)	M1(A)-IgG1(Fc)	M1(S)-IgG1(Fc)	M1(A)-IgG1(Fc)	M1(S)-IgG1(Fc)
1	2.19+/-1.00	2.77+/-0.55	2.00+/-1.09	2.03+/-2.52	1.17+/-0.56	1.63+/-1.06
2	3.02+/-1.34	1.56+/-0.74	1.74+/-1.57	1.86+/-1.67	1.63+/-1.14	2.12+/-1.37
3	2.82+/-0.70	3.09+/-1.02	2.23+/-2.06	1.59+/-1.24	1.95+/-1.25	1.62+/-1.37
4	3.15+/-0.78	2.03+/-0.61	2.91+/-1.14	2.47+/-1.66	3.05+/-1.25	1.59+/-1.09
5	2.74+/-1.46	2.54+/-0.98	1.81+/-1.28	1.89+/-1.25	1.68+/-0.74	1.71+/-1.07
